# Supplementary material
Source: Springer Nature journal article supplement (https://www.springermedizin.de/resource/supplementary/12875_2013_977_MOESM1_ESM.pdf/9435534)
Supplement: MOESM1 [file 9435534]

Study population  
240 patients IFG within 50 general practices

Randomisation

**Control Group:**

- general practices N=25
- patients N=120

Baseline measurement

**Care as usual:**

Dutch Diabetes Mellitus  
type 2 guideline

1-year follow up

**Care as usual:**

Dutch Diabetes Mellitus  
type 2 guideline

2-year follow up

**Experimental Group:**

- general practices N=25
- patients N=120

Baseline measurement

**Intervention:**

*'the road map towards  
diabetes prevention'*

1-year follow up

**Care as usual:**

Dutch Diabetes Mellitus  
type 2 guideline

2-year follow up
